# Supplementary material
Source: PubMed Central journal article supplement (PMC6759855)
Supplement: NIHMS1051132-supplement-1.pdf [file NIHMS1051132-supplement-1.pdf]

## ONLINE MATERIAL

### Ebox1—Precipitating and other preceding circumstances of suicide — National Violent Death Reporting System

#### **Suicide Decedent Precipitating Circumstances**

- Intimate partner problems- problems with a current or former intimate partner that appear to have contributed to the suicide.
- Civil legal problems- civil legal (non-criminal) problems appear to have contributed to the death.
- Financial problems- problems such as bankruptcy, overwhelming debt, or foreclosure of a home or business.
- Job problems- Job problem(s) appear to have contributed to the death. Problems could be related to work performance or joblessness (e.g., having difficulty finding a job).
- Other relationship problems- decedent had relationship problems with a family member (other than an intimate partner), a friend, or an associate that appear to have contributed to the death.
- Physical health problems - physical health problem(s) appear to have contributed to the death (e.g., despondent over recent diagnosis of cancer or complain that he could not live with the pain associated with a condition).

#### **Other Preceding Circumstances Relevant to the Suicide Decedent**

- Current depressed mood - perceived by self or others to be depressed at the time of the injury.
- Mental health condition - identified as having a mental health condition or syndrome listed in the Diagnostic and Statistical Manual, Version IV (DSM-IV).
- Alcohol dependence - identified as having an alcohol dependence problem.
- Other substance abuse problems - identified as having a non-alcohol related substance abuse problem.
- Positive toxicology results for alcohol - tested positive for alcohol on a toxicology exam.
- Current mental health/substance abuse treatment - currently in treatment for a mental health condition or a substance abuse problem.
- History of mental health/substance abuse treatment - had a history of ever being treated for a mental health condition or substance abuse problem.
- History of suicide attempts - had a history of attempting suicide before the fatal incident.
- Disclosed intent to die by suicide - disclosed to another person his/her thoughts and/or plans to commit suicide within the last month. Disclosure of suicidal thoughts or plan can be verbal, written or electronic.
- Person left a suicide note - decedent left a note, e-mail message, video, or other communication indicating an intent to die by suicide.

#### **Circumstances for Potential Prevention Opportunities among Intimate Partner Homicide-Suicides**

- History of physical domestic violence by perpetrator - history of physical violence within the household perpetrated by the perpetrator.
- Current restraining order against perpetrator by victim - victim had a current restraining/protective order in place against the perpetrator.
- History of law enforcement being called to residence - intimate partners' household had a history of contact with law enforcement for domestic issues.
- History of court interaction with perpetrator – perpetrator had court/legal intervention for domestic violence issues.
- Perpetrator jealousy of current/former intimate partner's new relationship or perceived new relationship – perpetrator's jealousy or distress over a current or former intimate partner's relationship or suspected relationship with another person led to the incident.
- Recent breakup - there was a recent discussion of break up, or the couple was in the process of a break up (e.g. moving out, serving divorce papers).
- Perpetrator made threats to kill victim - perpetrator made threats to kill the victim either directly to the victim or

to another bystander (e.g., an acquaintance of the victim or perpetrator).

- Mental or physical burden of caring for victim - perpetrator mental or physical burden of caring for the victim was mentioned as a contributing factor.
- Perpetrator's physical health issues played a role in the incident - perpetrator's health issues contributed to the incident (e.g., the perpetrator claimed he physically could no longer care for his spouse because of health issues.)
- Victim's physical health issues played a role in the incident - victim's health issues contributed to the incident (e.g., the perpetrator claimed he did not want to see his spouse suffer any more).
- Nursing homes/assisted living played a role in the incident - mention of nursing homes/assisted living playing a role in the incident.
